# Supplementary material for: Ab initio treatment of molecular Coster–Kronig decay using complex-scaled equation-of-motion coupled-cluster theory
Source: Royal Society of Chemistry journal article supplement (doi:10.1039/d4cp02085e), 2024-01-01
Supplement: d4cp02085e1.pdf [file d4cp02085e1.pdf]

# **Ab initio treatment of molecular Coster-Kronig decay using complex-scaled equation-of-motion coupled-cluster theory**

## **Supplementary Information**

Jan Philipp Drennhaus, Anthuan Ferino-Pérez, Florian Matz,  
and Thomas-C. Jagau

Table 1: Exponents of complex-scaled basis functions.

| H          | S          | Ar         | H          | S          | Ar         |
|------------|------------|------------|------------|------------|------------|
| s-shells   |            |            | p-shells   |            |            |
| 0.33027132 | 2.38134993 | 2.20531200 | 1.32938926 | 9.58527386 | 8.87669400 |
| 0.21397640 | 1.54283057 | 1.42877900 | 0.86200227 | 6.21528098 | 5.75582400 |
| 0.10698820 | 0.77141529 | 0.71438900 | 0.43100117 | 3.10764077 | 2.87791200 |
| 0.05349410 | 0.38570764 | 0.35719500 | 0.21550055 | 1.55382011 | 1.43895600 |
| 0.02674705 | 0.19285382 | 0.17859750 | 0.10775027 | 0.77691005 | 0.71947800 |
| 0.01337352 | 0.09642691 | 0.08929875 | 0.05387514 | 0.38845503 | 0.35973900 |
| 0.00668676 | 0.04821346 | 0.04464938 | 0.02693757 | 0.19422751 | 0.17986950 |
| 0.00334338 | 0.02410673 | 0.02232469 | 0.01346878 | 0.09711376 | 0.08993475 |
| d-shells   |            |            |            |            |            |
| 1.80846418 | 13.0395400 | 12.0756100 | 0.07992358 | 0.57627173 | 0.53367150 |
| 0.63938860 | 4.61017327 | 4.26937200 | 0.03996179 | 0.28813586 | 0.26683575 |
| 0.31969434 | 2.30508691 | 2.13468600 | 0.01998090 | 0.14406793 | 0.13341788 |
| 0.15984717 | 1.15254345 | 1.06734300 | 0.00999045 | 0.07203397 | 0.06670894 |

Table 2: Optimal complex scaling angles.

|                  | Method       | Basis                   | Angle |
|------------------|--------------|-------------------------|-------|
| Ar               | CS-EOM-CCSD  | aug-cc-pCVQZ            | 16°   |
| Ar               | CS-EOM-CCSD  | aug-cc-pCV5Z            | 17°   |
| Ar               | CBF-EOM-CCSD | aug-cc-pCV5Z+4(sp)      | 14°   |
| Ar               | CBF-EOM-CCSD | aug-cc-pCV5Z+6(sp)      | 32°   |
| Ar               | CBF-EOM-CCSD | aug-cc-pCV5Z+8(sp)      | 34°   |
| H <sub>2</sub> S | CBF-EOM-CCSD | aug-cc-pCVTZ(5sp)+4(sp) | 17°   |
| H <sub>2</sub> S | CBF-EOM-CCSD | aug-cc-pCVTZ(5sp)+6(sp) | 27°   |
| H <sub>2</sub> S | CBF-EOM-CCSD | aug-cc-pCVTZ(5sp)+8(sp) | 14°   |

Table 3: Partial Auger decay widths in meV for the  $2s^{-1}$  state of argon computed with CS-EOM-CCSD and CBF-EOM-CCSD using different basis sets. Results from Phys. Rev. A 103, 063102 (2021) obtained using multiconfigurational Dirac-Hartree-Fock (MCDHF) theory are shown as well.

| Decay channel                       | CS-EOM-CCSD      |                  | CBF-EOM-CCSD |                        |        | MCDHF                               |
|-------------------------------------|------------------|------------------|--------------|------------------------|--------|-------------------------------------|
|                                     | aug-cc-<br>pCVQZ | aug-cc-<br>pCV5Z | 4(sp)d       | aug-cc-pCV5Z<br>6(sp)d | 8(sp)d | [Phys. Rev. A 103<br>063102 (2021)] |
| L <sub>2,3</sub> M channels         |                  |                  |              |                        |        |                                     |
| <sup>1</sup> P ( $2p^{-1}3s^{-1}$ ) | 969.6            | 1040.7           | 85.5         | 612.4                  | 1146.1 | 414.7                               |
| <sup>3</sup> D ( $2p^{-1}3p^{-1}$ ) | 586.6            | 569.8            | 251.0        | 587.9                  | 492.2  | 125.1/198.8/337.7 <sup>a</sup>      |
| <sup>1</sup> S ( $2p^{-1}3p^{-1}$ ) | 357.6            | 389.0            | 318.3        | 427.1                  | 361.6  | 267.9                               |
| <sup>1</sup> D ( $2p^{-1}3p^{-1}$ ) | 229.0            | 219.1            | 82.9         | 399.4                  | 126.5  | 223.8                               |
| <sup>3</sup> S ( $2p^{-1}3p^{-1}$ ) | 144.5            | 154.2            | 83.7         | 143.7                  | 148.5  | 143.5                               |
| <sup>3</sup> P ( $2p^{-1}3p^{-1}$ ) | 0.0              | 0.0              | 0.0          | 0.0                    | 0.0    | 7.2/26.8/18.9 <sup>a</sup>          |
| <sup>1</sup> P ( $2p^{-1}3p^{-1}$ ) | 0.0              | 0.0              | 0.0          | 0.0                    | 0.0    | 23.6                                |
| <sup>3</sup> P ( $2p^{-1}3s^{-1}$ ) | -14.1            | 0.5              | -1.4         | 45.9                   | -15.9  | 5.3/213.9/30.3 <sup>a</sup>         |
| MM channels                         |                  |                  |              |                        |        |                                     |
| <sup>1</sup> P ( $3s^{-1}3p^{-1}$ ) | 44.2             | 46.6             | 28.6         | 47.8                   | 45.1   | 15.3                                |
| <sup>3</sup> P ( $3s^{-1}3p^{-1}$ ) | 18.4             | 18.9             | 8.2          | 17.5                   | 19.1   | 3.4/10.1/17.1 <sup>a</sup>          |
| <sup>1</sup> S ( $3s^{-2}$ )        | 13.9             | 13.7             | 10.7         | 14.0                   | 13.6   | 8.2                                 |
| <sup>1</sup> S ( $3p^{-2}$ )        | 4.1              | 4.1              | 3.7          | 3.7                    | 4.0    | 0.7 <sup>b</sup>                    |
| <sup>1</sup> D ( $3p^{-2}$ )        | -6.5             | -6.4             | 1.2          | -4.8                   | -6.5   |                                     |
| <sup>3</sup> P ( $3p^{-2}$ )        | 0.0              | 0.0              | 0.0          | 0.0                    | 0.0    |                                     |

<sup>a</sup> Widths of the <sup>3</sup>P<sub>0</sub>/<sup>3</sup>P<sub>1</sub>/<sup>3</sup>P<sub>2</sub> or <sup>3</sup>D<sub>1</sub>/<sup>3</sup>D<sub>2</sub>/<sup>3</sup>D<sub>3</sub> channels, respectively.

<sup>b</sup> Combined width of the  $3p^{-2}$  channels (<sup>1</sup>S, <sup>1</sup>D, <sup>3</sup>P).

Table 4: Partial Auger decay widths in meV for the  $2a_1^{-1}$  state of hydrogen sulfide computed with CBF-EOM-CCSD using the aug-cc-pCVTZ(5sp) basis set augmented by 4, 6, or 8 complex-scaled shells.

| Decay<br>channel            | aug-cc-pCVTZ(5sp) |       |       | Decay<br>channel            | aug-cc-pCVTZ(5sp) |       |       |
|-----------------------------|-------------------|-------|-------|-----------------------------|-------------------|-------|-------|
|                             | 4(sp)             | 6(sp) | 8(sp) |                             | 4(sp)             | 6(sp) | 8(sp) |
| L <sub>2,3</sub> M channels |                   |       |       | MM channels                 |                   |       |       |
| $^1B_2(4a_1^{-1}1b_2^{-1})$ | 215.2             | 225.6 | 244.3 | $^1B_2(4a_1^{-1}2b_2^{-1})$ | 10.3              | 9.3   | 9.3   |
| $^1B_1(4a_1^{-1}1b_1^{-1})$ | 236.1             | 224.9 | 208.7 | $^1A_1(4a_1^{-2})$          | 8.7               | 7.7   | 7.5   |
| $^1A_1(3a_1^{-1}4a_1^{-1})$ | 216.9             | 212.8 | 236.4 | $^1A_1(4a_1^{-1}5a_1^{-1})$ | 8.8               | 7.5   | 7.2   |
| $^1A_1(1b_2^{-1}2b_2^{-1})$ | 124.8             | 101.9 | 97.8  | $^1B_1(4a_1^{-1}2b_1^{-1})$ | 8.6               | 6.0   | 5.9   |
| $^1A_1(3a_1^{-1}5a_1^{-1})$ | -45.5             | 100.2 | 97.2  | $^3B_2(4a_1^{-1}2b_2^{-1})$ | 5.0               | 3.9   | 3.8   |
| $^3A_1(1b_2^{-1}2b_2^{-1})$ | 54.1              | 73.4  | 76.1  | $^3A_1(4a_1^{-1}5a_1^{-1})$ | 4.6               | 3.3   | 3.2   |
| $^1A_1(1b_1^{-1}2b_1^{-1})$ | 57.2              | 57.9  | 65.2  | $^1A_1(5a_1^{-2})$          | 3.1               | 2.6   | 2.7   |
| $^3A_1(3a_1^{-1}5a_1^{-1})$ | -21.7             | 54.9  | 57.3  | $^3B_1(4a_1^{-1}2b_1^{-1})$ | 3.6               | 2.6   | 2.4   |
| $^3A_1(1b_1^{-1}2b_1^{-1})$ | 37.8              | 47.4  | 59.8  | $^1B_2(5a_1^{-1}2b_2^{-1})$ | 1.1               | 0.7   | 0.8   |
| $^1B_2(5a_1^{-1}1b_2^{-1})$ | 9.7               | 42.2  | 43.0  | $^1B_1(5a_1^{-1}2b_1^{-1})$ | 1.1               | 0.6   | 0.6   |
| $^3B_1(3a_1^{-1}2b_1^{-1})$ | 23.0              | 38.3  | 34.1  | $^3B_2(5a_1^{-1}2b_2^{-1})$ | 0.6               | 0.5   | 0.5   |
| $^1B_1(5a_1^{-1}1b_1^{-1})$ | 29.8              | 35.9  | 33.6  | $^1A_1(2b_2^{-2})$          | 0.6               | 0.4   | 0.4   |
| $^3A_2(1b_1^{-1}2b_2^{-1})$ | 8.3               | 31.4  | 32.6  | $^3B_1(5a_1^{-1}2b_1^{-1})$ | 0.3               | 0.3   | 0.3   |
| $^3B_2(3a_1^{-1}2b_2^{-1})$ | 11.3              | 37.7  | 32.2  | $^1A_1(2b_1^{-2})$          | 0.5               | 0.1   | 0.1   |
| $^3A_2(2b_1^{-1}1b_2^{-1})$ | 10.6              | 28.6  | 30.6  | $^3A_2(2b_1^{-1}2b_2^{-1})$ | 0.0               | 0.0   | 0.0   |
| $^3B_2(5a_1^{-1}1b_2^{-1})$ | -4.2              | 25.0  | 26.7  | $^1A_2(2b_1^{-1}2b_2^{-1})$ | 0.0               | -0.6  | -0.6  |
| $^3B_1(5a_1^{-1}1b_1^{-1})$ | 16.8              | 18.9  | 22.9  |                             |                   |       |       |
| $^1B_1(3a_1^{-1}2b_1^{-1})$ | -3.2              | 21.2  | 9.2   |                             |                   |       |       |
| $^1A_2(2b_1^{-1}1b_2^{-1})$ | -8.8              | 9.8   | 8.8   |                             |                   |       |       |
| $^1A_2(1b_1^{-1}2b_2^{-1})$ | -1.2              | 0.3   | 8.3   |                             |                   |       |       |
| $^1B_2(3a_1^{-1}2b_2^{-1})$ | 2.9               | 11.2  | 6.3   |                             |                   |       |       |
| $^3B_2(4a_1^{-1}1b_2^{-1})$ | -3.6              | -6.7  | -5.3  |                             |                   |       |       |
| $^3A_1(3a_1^{-1}4a_1^{-1})$ | 1.4               | -13.2 | -13.7 |                             |                   |       |       |
| $^3B_1(4a_1^{-1}1b_1^{-1})$ | -4.3              | -17.2 | -15.6 |                             |                   |       |       |

Table 5: Partial Auger decay widths in meV for the  $2a_1^{-1}$  state of hydrogen sulfide computed with Fano-EOM-CCSD using the aug-cc-pCVTZ(5sp) basis set and freezing the  $1a_1$  and  $2a_1$  orbitals. Total energies of the doubly ionized target states are given in Hartree. The ground state of neutral hydrogen sulfide is at -399.16457 a.u.

| Decay channel                 | Total energy | Decay width | Decay channel                 | Total energy | Decay width |
|-------------------------------|--------------|-------------|-------------------------------|--------------|-------------|
| L <sub>2,3</sub> M channels   |              |             | MM channels                   |              |             |
| $^1B_1 (4a_1^{-1} 1b_1^{-1})$ | -391.50805   | 94.0        | $^1A_1 (4a_1^{-2})$           | -397.06871   | 2.5         |
| $^1A_1 (3a_1^{-1} 4a_1^{-1})$ | -391.50812   | 94.4        | $^1B_1 (4a_1^{-1} 2b_1^{-1})$ | -397.29553   | 0.2         |
| $^1B_2 (4a_1^{-1} 1b_2^{-1})$ | -391.51614   | 69.5        | $^1A_1 (4a_1^{-1} 5a_1^{-1})$ | -397.48515   | 2.8         |
| $^3B_1 (4a_1^{-1} 1b_1^{-1})$ | -391.53342   | 589.1       | $^3B_1 (4a_1^{-1} 2b_1^{-1})$ | -397.51107   | 0.4         |
| $^3A_1 (3a_1^{-1} 4a_1^{-1})$ | -391.54028   | 617.2       | $^1B_2 (4a_1^{-1} 2b_2^{-1})$ | -397.56269   | 0.7         |
| $^3B_2 (4a_1^{-1} 1b_2^{-1})$ | -391.54571   | 510.0       | $^3A_1 (4a_1^{-1} 5a_1^{-1})$ | -397.59880   | 0.4         |
| $^1A_1 (1b_1^{-1} 2b_1^{-1})$ | -391.89365   | 53.1        | $^3B_2 (4a_1^{-1} 2b_2^{-1})$ | -397.68791   | 0.5         |
| $^1B_1 (3a_1^{-1} 2b_1^{-1})$ | -391.92273   | 76.1        | $^1A_1 (2b_1^{-2})$           | -397.70788   | 0.4         |
| $^1A_2 (2b_1^{-1} 1b_2^{-1})$ | -391.93410   | 43.8        | $^1B_1 (5a_1^{-1} 2b_1^{-1})$ | -397.82839   | 0.6         |
| $^3B_1 (3a_1^{-1} 2b_1^{-1})$ | -391.94041   | 102.1       | $^3B_1 (5a_1^{-1} 2b_1^{-1})$ | -397.88710   | 0.2         |
| $^3A_1 (1b_1^{-1} 2b_1^{-1})$ | -391.94593   | 255.1       | $^1A_1 (5a_1^{-2})$           | -397.89703   | 0.5         |
| $^3A_2 (2b_1^{-1} 1b_2^{-1})$ | -391.94798   | 60.9        | $^1A_2 (2b_1^{-1} 2b_2^{-1})$ | -397.96118   | 0.5         |
| $^1A_1 (3a_1^{-1} 5a_1^{-1})$ | -391.94873   | 73.1        | $^3A_2 (2b_1^{-1} 2b_2^{-1})$ | -397.99345   | 0.0         |
| $^1B_2 (5a_1^{-1} 1b_2^{-1})$ | -391.98548   | 64.4        | $^1B_2 (5a_1^{-1} 2b_2^{-1})$ | -398.02620   | 0.6         |
| $^3B_1 (5a_1^{-1} 1b_1^{-1})$ | -392.00506   | 199.9       | $^3B_2 (5a_1^{-1} 2b_2^{-1})$ | -398.07858   | 0.2         |
| $^1B_1 (5a_1^{-1} 1b_1^{-1})$ | -392.00615   | 18.0        | $^1A_1 (2b_2^{-2})$           | -398.11993   | 0.6         |
| $^3B_2 (5a_1^{-1} 1b_2^{-1})$ | -392.00696   | 139.2       |                               |              |             |
| $^3A_1 (3a_1^{-1} 5a_1^{-1})$ | -392.01102   | 283.0       |                               |              |             |
| $^1A_1 (1b_2^{-1} 2b_2^{-1})$ | -392.04610   | 86.7        |                               |              |             |
| $^1A_2 (1b_1^{-1} 2b_2^{-1})$ | -392.10138   | 28.4        |                               |              |             |
| $^3A_2 (1b_1^{-1} 2b_2^{-1})$ | -392.10779   | 129.2       |                               |              |             |
| $^1B_2 (3a_1^{-1} 2b_2^{-1})$ | -392.11116   | 22.5        |                               |              |             |
| $^3B_2 (3a_1^{-1} 2b_2^{-1})$ | -392.11196   | 144.0       |                               |              |             |
| $^3A_1 (1b_2^{-1} 2b_2^{-1})$ | -392.12382   | 269.2       |                               |              |             |

Table 6: Total energies of dicationic states of argon in Hartree computed with EOM-DIP-CCSD and the aug-cc-pCV5Z basis set. The ground state of the neutral argon atom is at -527.50192261 a.u.

| State                 | Energy        | State                 | Energy        |
|-----------------------|---------------|-----------------------|---------------|
| $^1S(2s^{-2})$        | -502.11953780 | $^1S(2p^{-1}3p^{-1})$ | -516.93623795 |
| $^1P(2s^{-1}2p^{-1})$ | -504.15162313 | $^1D(2p^{-1}3p^{-1})$ | -517.00415593 |
| $^3P(2s^{-1}2p^{-1})$ | -504.99960172 | $^3P(2p^{-1}3p^{-1})$ | -517.05644742 |
| $^1S(2p^{-2})$        | -506.71950954 | $^3S(2p^{-1}3p^{-1})$ | -517.08070346 |
| $^1D(2p^{-2})$        | -507.04763959 | $^3D(2p^{-1}3p^{-1})$ | -517.10768441 |
| $^3P(2p^{-2})$        | -507.32726971 | $^1P(2p^{-1}3p^{-1})$ | -517.12890315 |
| $^1S(2s^{-1}3s^{-1})$ | -513.64440003 | $^1S(3s^{-2})$        | -524.63993328 |
| $^3S(2s^{-1}3s^{-1})$ | -513.75903219 | $^1P(3s^{-1}3p^{-1})$ | -525.15594198 |
| $^1P(2s^{-1}3p^{-1})$ | -514.30769076 | $^3P(3s^{-1}3p^{-1})$ | -525.33962206 |
| $^3P(2s^{-1}3p^{-1})$ | -514.56199259 | $^1S(3p^{-2})$        | -525.73558656 |
| $^1P(2p^{-1}3s^{-1})$ | -516.40222113 | $^1D(3p^{-2})$        | -525.82512212 |
| $^3P(2p^{-1}3s^{-1})$ | -516.44380731 | $^3P(3p^{-2})$        | -525.88588074 |

Table 7: Total energies of dicationic states of hydrogen sulfide in Hartree computed with EOM-DIP-CCSD and the aug-cc-pCVTZ(5sp) basis set. The ground state of neutral hydrogen sulfide is at -399.29963301 a.u.

| State                       | Energy        | State                       | Energy        | State                       | Energy        |
|-----------------------------|---------------|-----------------------------|---------------|-----------------------------|---------------|
| $^1B_1(4a_1^{-1}1b_1^{-1})$ | -391.50805055 | $^3B_1(5a_1^{-1}1b_1^{-1})$ | -392.00505733 | $^1B_2(4a_1^{-1}2b_2^{-1})$ | -397.56268737 |
| $^1A_1(3a_1^{-1}4a_1^{-1})$ | -391.50812376 | $^1B_1(5a_1^{-1}1b_1^{-1})$ | -392.00614771 | $^3A_1(4a_1^{-1}5a_1^{-1})$ | -397.59880345 |
| $^1B_2(4a_1^{-1}1b_2^{-1})$ | -391.51614467 | $^3B_2(5a_1^{-1}1b_2^{-1})$ | -392.00695775 | $^3B_2(4a_1^{-1}2b_2^{-1})$ | -397.68790891 |
| $^3B_1(4a_1^{-1}1b_1^{-1})$ | -391.53341771 | $^3A_1(3a_1^{-1}5a_1^{-1})$ | -392.01102152 | $^1A_1(2b_1^{-2})$          | -397.70787930 |
| $^3A_1(3a_1^{-1}4a_1^{-1})$ | -391.54027728 | $^1A_1(1b_2^{-1}2b_2^{-1})$ | -392.04610035 | $^1B_1(5a_1^{-1}2b_1^{-1})$ | -397.82838608 |
| $^3B_2(4a_1^{-1}1b_2^{-1})$ | -391.54571226 | $^1A_2(1b_1^{-1}2b_2^{-1})$ | -392.10138109 | $^3B_1(5a_1^{-1}2b_1^{-1})$ | -397.88709715 |
| $^1A_1(1b_1^{-1}2b_1^{-1})$ | -391.89364688 | $^3A_2(1b_1^{-1}2b_2^{-1})$ | -392.10778991 | $^1A_1(5a_1^{-2})$          | -397.89702856 |
| $^1B_1(3a_1^{-1}2b_1^{-1})$ | -391.92272791 | $^1B_2(3a_1^{-1}2b_2^{-1})$ | -392.11116374 | $^1A_2(2b_1^{-1}2b_2^{-1})$ | -397.96117751 |
| $^1A_2(2b_1^{-1}1b_2^{-1})$ | -391.93409866 | $^3B_2(3a_1^{-1}2b_2^{-1})$ | -392.11196153 | $^3A_2(2b_1^{-1}2b_2^{-1})$ | -397.99345391 |
| $^3B_1(3a_1^{-1}2b_1^{-1})$ | -391.94040548 | $^3A_1(1b_2^{-1}2b_2^{-1})$ | -392.12382102 | $^1B_2(5a_1^{-1}2b_2^{-1})$ | -398.02619840 |
| $^3A_1(1b_1^{-1}2b_1^{-1})$ | -391.94593051 | $^1A_1(4a_1^{-2})$          | -397.06870917 | $^3B_2(5a_1^{-1}2b_2^{-1})$ | -398.07858230 |
| $^3A_2(2b_1^{-1}1b_2^{-1})$ | -391.94797578 | $^1B_1(4a_1^{-1}2b_1^{-1})$ | -397.29553406 | $^1A_1(2b_2^{-2})$          | -398.11993149 |
| $^1A_1(3a_1^{-1}5a_1^{-1})$ | -391.94872814 | $^1A_1(4a_1^{-1}5a_1^{-1})$ | -397.48514587 |                             |               |
| $^1B_2(5a_1^{-1}1b_2^{-1})$ | -391.98547668 | $^3B_1(4a_1^{-1}2b_1^{-1})$ | -397.51106502 |                             |               |

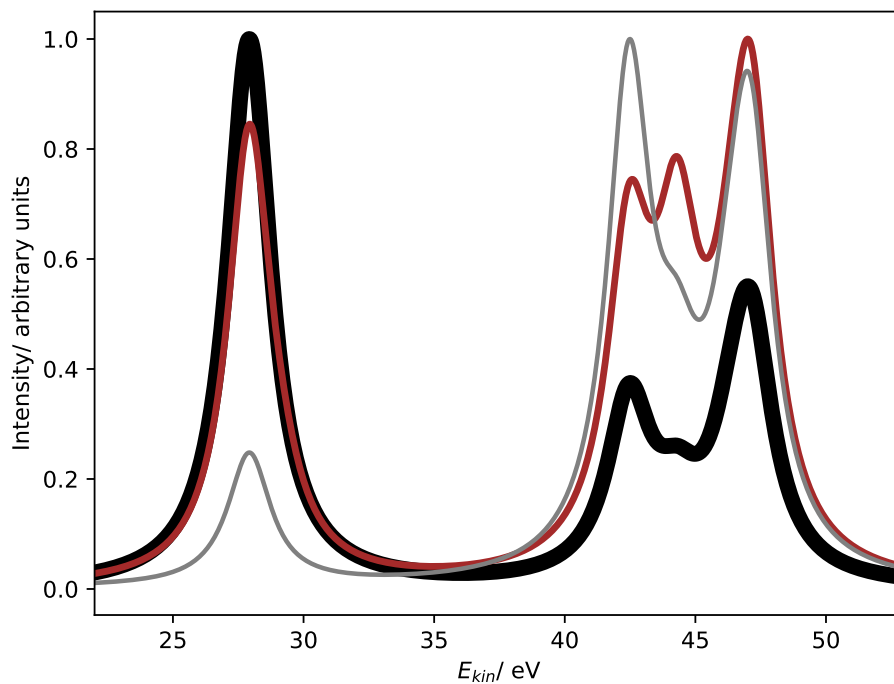

Figure 1:  $L_1L_{2,3}M$  Coster-Kronig spectrum of argon. Partial decay widths were computed with CBF-EOM-CCSD and the aug-cc-pCV5Z basis set augmented by 4 (gray), 6 (brown), and 8 (black) complex-scaled s, p, and d shells.

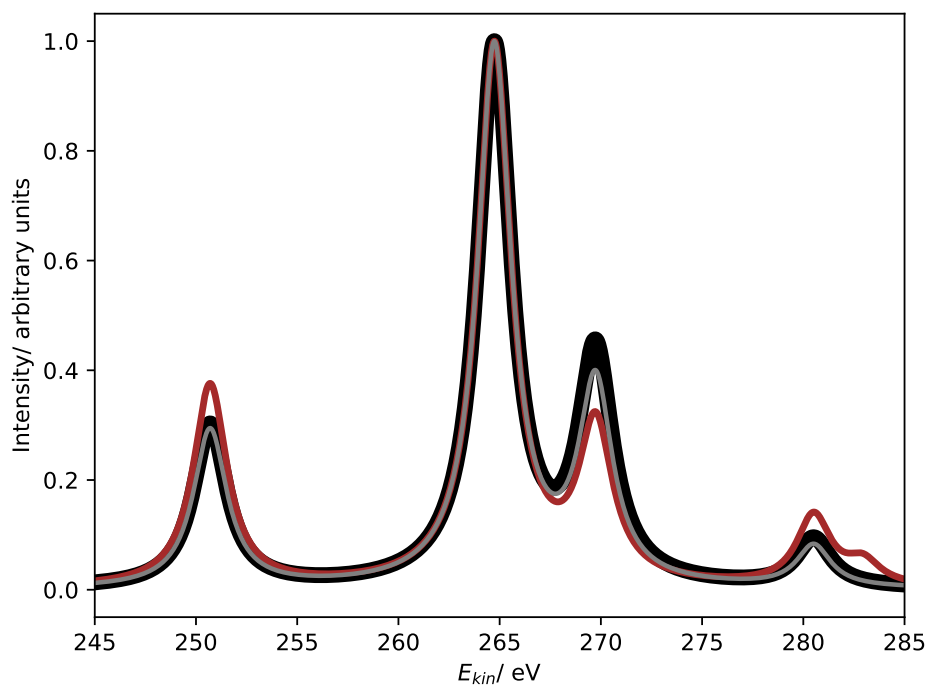

Figure 2:  $L_1MM$  Auger spectrum of argon. Partial decay widths were computed with CBF-EOM-CCSD and the aug-cc-pCV5Z basis set augmented by 4 (gray), 6 (brown), and 8 (black) complex-scaled s, p, and d shells.

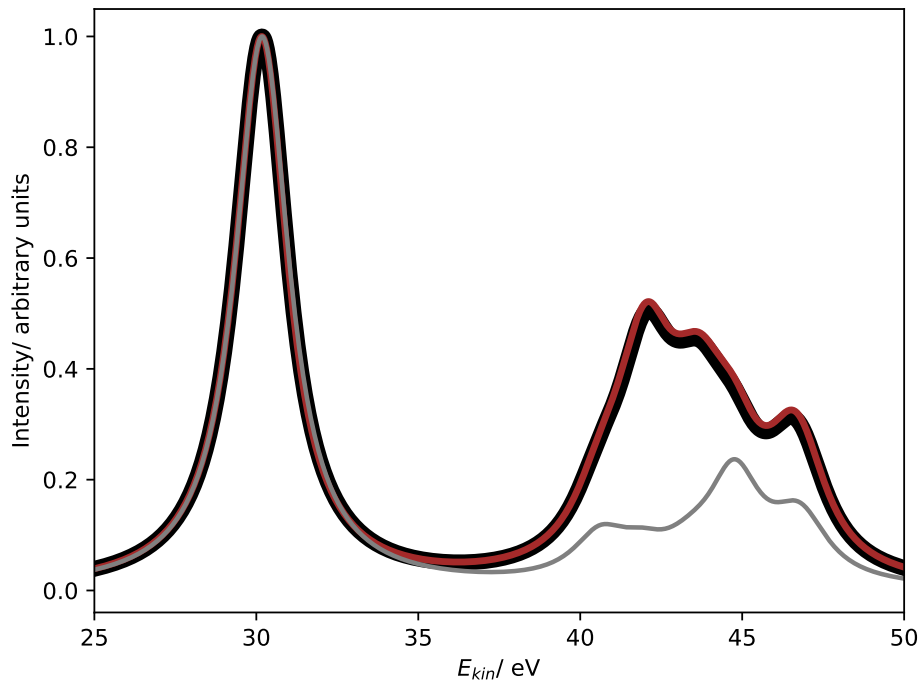

Figure 3:  $L_1L_{2,3}M$  Coster-Kronig spectrum of hydrogen sulfide. Partial decay widths were computed with CBF-EOM-CCSD and the aug-cc-pCVTZ(5sp) basis set augmented by 4 (gray), 6 (brown), and 8 (black) complex-scaled s, p, and d shells.

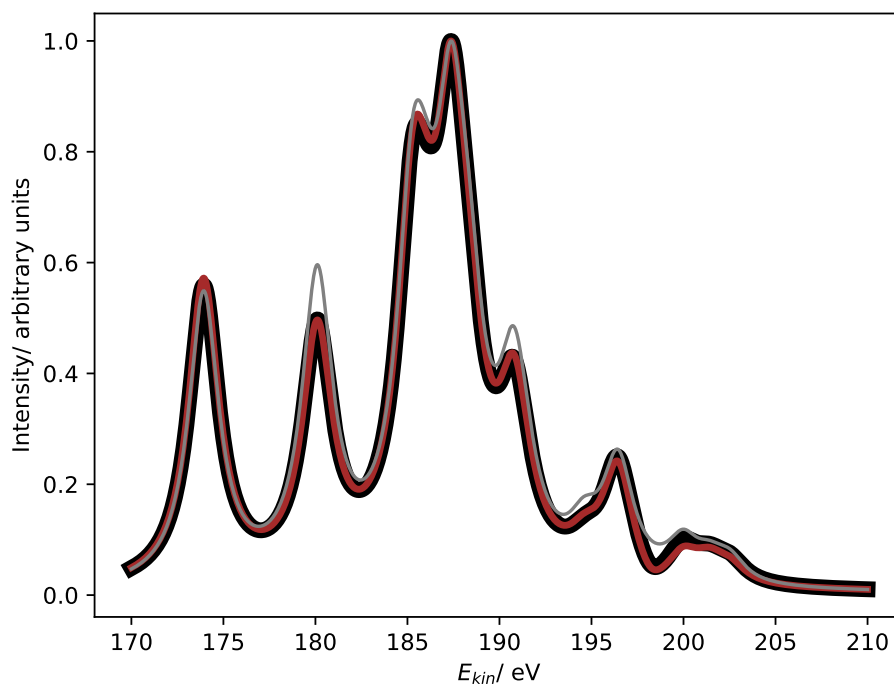

Figure 4:  $L_1MM$  Auger spectrum of hydrogen sulfide. Partial decay widths were computed with CBF-EOM-CCSD and the aug-cc-pCVTZ(5sp) basis set augmented by 4 (gray), 6 (brown), and 8 (black) complex-scaled s, p, and d shells.
